# Supplementary figures and images for: Online quantification of nicotine in e-cigarette aerosols by vacuum ultraviolet photoionization mass spectrometry
Source: Royal Society of Chemistry journal article supplement (doi:10.1039/d4ay00279b), 2024-01-01

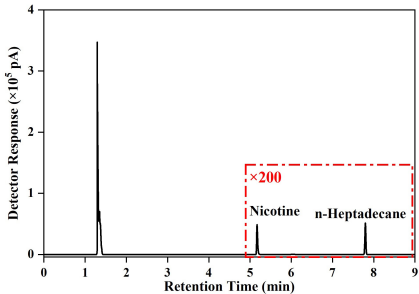

Supplement: d4ay00279b2.pdf [file d4ay00279b2.pdf]

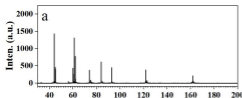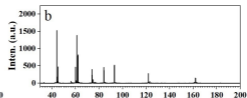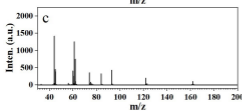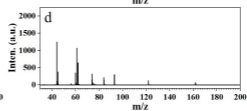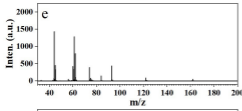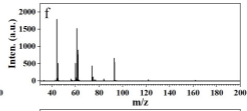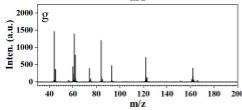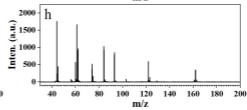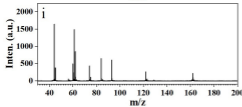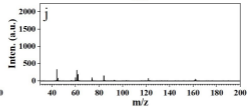

Supplement: d4ay00279b3.pdf [file d4ay00279b3.pdf]

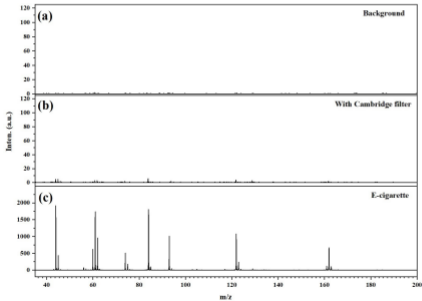

Supplement: d4ay00279b4.pdf [file d4ay00279b4.pdf]

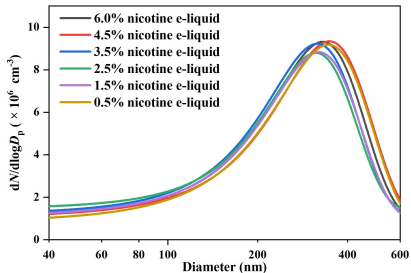

Supplement: d4ay00279b5.pdf [file d4ay00279b5.pdf]

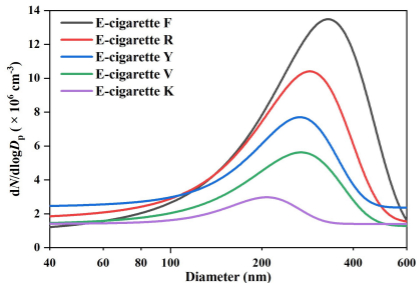

Supplement: d4ay00279b6.pdf [file d4ay00279b6.pdf]
